# Supplementary material for: KCTD12 is negatively regulated by Kit in gastrointestinal stromal tumors
Source: PubMed Central journal article supplement (PMC6007475; doi:10.18632/oncotarget.25469), 2018-06-05
Supplement: oncotarget-09-27016-s001.pdf [file oncotarget-09-27016-s001.pdf]

## ***KCTD12* is negatively regulated by Kit in gastrointestinal stromal tumors**

### **SUPPLEMENTARY MATERIALS**

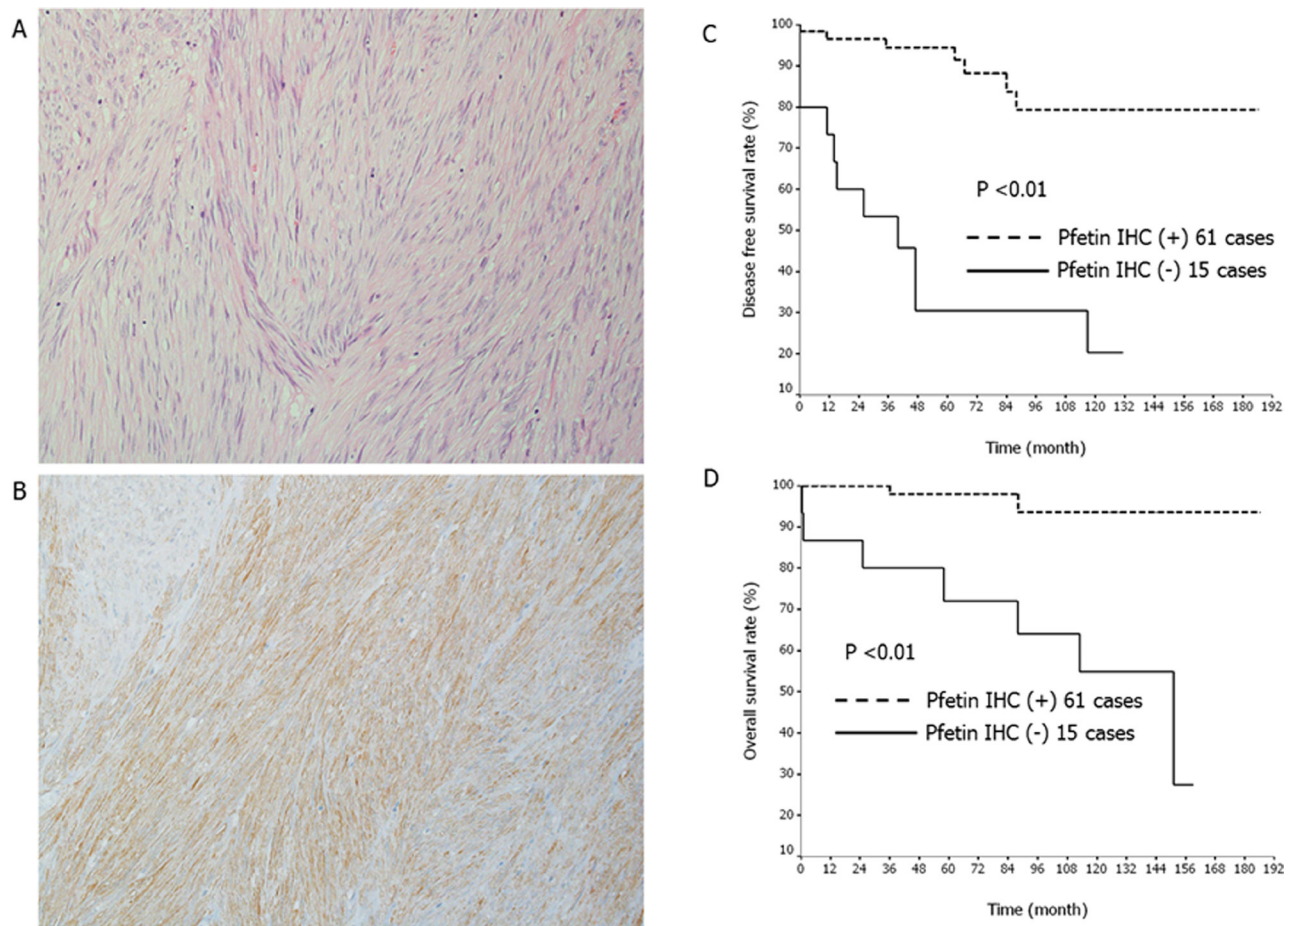

**Supplementary Figure 1: Survival analysis according to the status of pftin positivity or *KCTD12* genetic alteration.** (A) Histology of a case of gastric GIST. (B) Immunohistochemistry for pftin. Pftin is diffusely positive for tumor cells. (C) Disease-free survival rate was significantly higher in pftin-positive cases than in pftin-negative cases. (D) Pftin positivity significantly affected the overall survival in GIST patients.

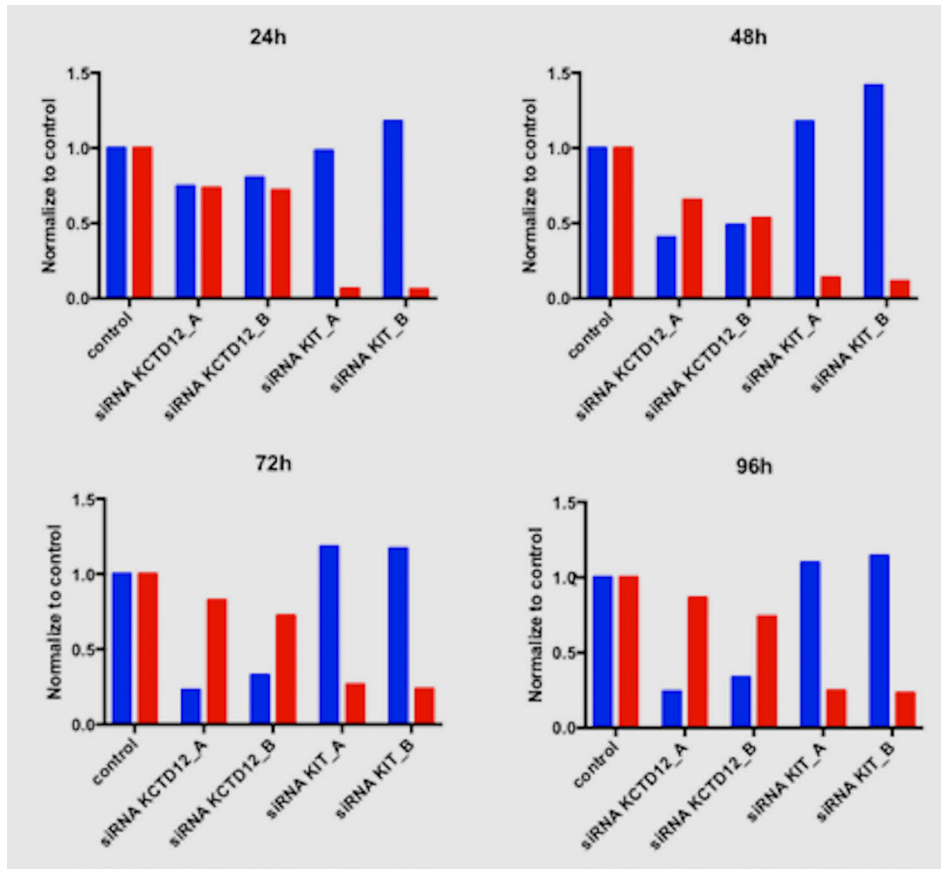

**Supplementary Figure 2: Signal intensities of western blotting in Figure 3 were normalized by those of internal control GAPDH.** Signal intensities were measured by soft-wares Image J. Blue: pFetin expression level. Red: Kit expression level.

**Supplementary Table 1: Clinicopathologic characteristics of 76 GISTs**

| <b>Features</b>     |                          | <b>No. of cases</b> | <b>Total</b> |
|---------------------|--------------------------|---------------------|--------------|
| Age                 |                          |                     | 76           |
|                     | <50                      | 20                  |              |
|                     | 50<                      | 56                  |              |
| Gender              |                          |                     | 76           |
|                     | Female                   | 28                  |              |
|                     | male                     | 48                  |              |
| Site                |                          |                     | 76           |
|                     | Stomach/Duodenum         | 60                  |              |
|                     | Small intestine          | 10                  |              |
|                     | Other                    | 6                   |              |
| Size                |                          |                     | 76           |
|                     | <5 cm                    | 44                  |              |
|                     | 5 cm–10 cm               | 24                  |              |
|                     | 10 cm<                   | 8                   |              |
| Necrosis            |                          |                     | 76           |
|                     | –                        | 54                  |              |
|                     | +                        | 22                  |              |
| Mitosis             |                          |                     | 76           |
|                     | <5                       | 51                  |              |
|                     | 5–10                     | 13                  |              |
|                     | 10<                      | 12                  |              |
| Risk classification |                          |                     | 76           |
|                     | Very low or low          | 38                  |              |
|                     | Intermediate             | 10                  |              |
|                     | High                     | 28                  |              |
| Pfetin expression   |                          |                     | 76           |
|                     | Negative                 | 15                  |              |
|                     | Positive                 | 61                  |              |
| Pfetin mutation     |                          |                     | 76           |
|                     | Mutation                 | 22                  |              |
|                     | Wild type                | 54                  |              |
| KIT expression      |                          |                     | 76           |
|                     | Negative/Not informative | 4                   |              |
|                     | Positive                 | 72                  |              |
| KIT genotype        |                          |                     | 76           |
|                     | Exon 9                   | 2                   |              |
|                     | Exon 11                  | 56                  |              |
|                     | Exon 13                  | 2                   |              |
|                     | Exon 17                  | 3                   |              |
|                     | N.A.                     | 13                  |              |

N.A.: Not available for information

**Supplementary Table 2: Association between pfetin expressions and co-factors**

|                            |                 | Pfetin expression |          | Total | P-value |
|----------------------------|-----------------|-------------------|----------|-------|---------|
|                            |                 | Positive          | Negative |       |         |
| Total                      |                 | 61                | 15       | 76    |         |
| KCTD12 mutation            |                 |                   |          |       |         |
|                            | Positive        | 18                | 4        | 22    | 0.923   |
|                            | Wild type       | 43                | 11       | 54    |         |
| KIT expression<br>(n = 72) |                 |                   |          |       |         |
|                            | +               | 35                | 8        | 71    | 1.000   |
|                            | 2+/3+           | 24                | 5        | 1     |         |
| KIT mutation<br>(n = 69)   |                 |                   |          |       |         |
|                            | Exon 9          | 2                 | 0        | 2     | 0.706   |
|                            | Exon 11         | 46                | 10       | 56    |         |
|                            | Exon 13         | 1                 | 1        | 2     |         |
|                            | Exon 17         | 3                 | 0        | 3     |         |
|                            | N.A.            | 2                 | 4        | 13    |         |
| Mitosis index<br>(/50HPFs) |                 |                   |          |       |         |
|                            | <5              | 45                | 6        | 51    | 0.029   |
|                            | >5              | 16                | 9        | 27    |         |
| Risk classification        |                 |                   |          |       |         |
|                            | Very low or low | 33                | 5        | 38    | 0.651   |
|                            | Intermediate    | 8                 | 2        | 10    |         |
|                            | High            | 20                | 8        | 28    |         |

Statistical analysis by Chi-squared test.

N.A. data not available.

**Supplementary Table 3: Association between *KCTD12* mutations and co-factors**

|                     |                      | <i>KCTD12</i> Mutation |      | Total | <i>P</i> value |
|---------------------|----------------------|------------------------|------|-------|----------------|
|                     |                      | Mut                    | Wild |       |                |
|                     |                      | 22                     | 54   | 76    |                |
| KIT expression      |                      |                        |      |       |                |
| ( <i>n</i> = 72)    | +                    | 12                     | 31   | 43    | 0.608          |
|                     | 2+/3+                | 10                     | 19   | 29    |                |
| KIT mutation        |                      |                        |      |       |                |
| ( <i>n</i> = 76)    | Exon 9               | 1                      | 1    | 2     | 0.918          |
|                     | Exon 11              | 16                     | 40   | 56    |                |
|                     | Exon 13              | 0                      | 2    | 2     |                |
|                     | Exon 17              | 1                      | 2    | 3     |                |
|                     | N.A.                 | 4                      | 9    | 13    |                |
| Mitosis index       |                      |                        |      |       |                |
|                     | <5                   | 14                     | 37   | 51    | 0.789          |
|                     | >5                   | 8                      | 17   | 25    |                |
| Size                |                      |                        |      |       |                |
|                     | <5 cm                | 13                     | 31   | 44    | 0.685          |
|                     | 5 cm–10 cm           | 8                      | 16   | 24    |                |
|                     | 10 cm<               | 1                      | 7    | 8     |                |
| Necrosis            |                      |                        |      |       |                |
|                     | –                    | 17                     | 37   | 54    | 0.666          |
|                     | +                    | 5                      | 17   | 22    |                |
| Risk classification |                      |                        |      |       |                |
|                     | Very low or low      | 12                     | 26   | 38    | 0.084          |
|                     | Intermediate         | 0                      | 10   | 10    |                |
|                     | High                 | 10                     | 18   | 28    |                |
| Site                |                      |                        |      |       |                |
|                     | Stomach/<br>Duodenum | 18                     | 42   | 60    | 0.870          |
|                     | Small intestine      | 3                      | 7    | 10    |                |
|                     | Other                | 1                      | 5    | 6     |                |

Statistical analysis by Chi-squared test.

N.A.: Data not available.

**Supplementary Table 4-1: The gene ontology (GO) analysis was performed to evaluate the gene expression changes by each functional category. Gene set names affected by the knockdown of KCTD12 or KIT in GIST T1 cell are shown in these Tables, respectively. Activated gene sets by knockdown are highlighted in red, and suppressed gene sets are highlighted in blue. See Supplementary\_Table\_4-1**

**Supplementary Table 4-2: The gene ontology (GO) analysis was performed to evaluate the gene expression changes by each functional category. Gene set names affected by the knockdown of KCTD12 or KIT in GIST T1 cell are shown in these Tables, respectively. Activated gene sets by knockdown are highlighted in red, and suppressed gene sets are highlighted in blue. See Supplementary\_Table\_4-2**

**Supplementary Table 5: Primer sequences for *KCTD12* and KIT**

| <b><i>KCTD12</i></b> |                          |
|----------------------|--------------------------|
| 1F                   | GAAGGCGGTTGCAGCTCCTGAG   |
| 1R                   | AGCGCCGGGTCACGTACACCT    |
| 2F                   | GACAGCAAAGGCCGCTTCTT     |
| 2R                   | CACGAGCTCTGGCAGCTCGAA    |
| 3F                   | CGGGACTTGCAGCTCGTGCTG    |
| 3R                   | TCACCCAGCGAGCCCTCCTTG TG |
| 4F                   | AGTACTTCGAGCTGCCAGAG     |
| 4R                   | CTGTTTCGGGCTCCGAGTAGC    |
| 5F                   | GTGACGAGCTGCTGCCGCTT     |
| 5R                   | CCGATGGTGATGTAGCCCGAG    |
| 6F                   | GGGCTACATCACCATCGGCT     |
| 6R                   | GGCTTTCGTTTCAGGGTGTCC    |
| 7F                   | ATCACCGTTTGC GGAAAGACG   |
| 7R                   | CACCATGTGGAAGCCCGACTC    |
| 8F                   | GCCTTCGACAAGCTGTCCGA     |
| 8R                   | GGAGCTCACTCCCTGCAGAA     |
| <b>KIT</b>           |                          |
| Ex9-F                | GCCACATCCCAAGTGT TTTATG  |
| EX9-R                | GAGCCTAAACATCCCCTTAAATTG |
| Ex11-F               | CCAGAGTGCTCTAATGACTG     |
| EX11-R               | AGCCCCTGTTTCATACTGAC     |
| Ex13-F               | CTTGACATCAGTTTGCCAGTTGT  |
| EX13-R               | GACAGACAATAAAAGGCAGCTTG  |
| Ex17-F               | TGGTTTTCTTTTCTCCTCAA     |
| EX17-R               | GCAGGACTGTCAAGCAGAGA     |

**Supplementary Table 6: Clinicopathologic features of the 76 GIST cases. See Supplementary\_Table\_6**
